# Supplementary material for: An optofluidic constriction chip for monitoring metastatic potential and drug response of cancer cells
Source: Royal Society of Chemistry journal article supplement (doi:10.1039/c5ib00023h), 2015-01-01
Supplement: c5ib00023h1.pdf [file c5ib00023h1.pdf]

**Table S.1** Average diameter of the untreated and drug-exposed tumor cells.

| Treatment<br>Cell lines | Average cell diameter $\pm$ SD ( $\mu\text{M}$ ) |                |                |                                 |                                  |
|-------------------------|--------------------------------------------------|----------------|----------------|---------------------------------|----------------------------------|
|                         | Control                                          | PTX            | CA-4           | Nocodazole-low<br>concentration | Nocodazole-high<br>concentration |
| MCF7                    | 15.8 $\pm$ 2,3                                   | 16.1 $\pm$ 2.1 | 16.1 $\pm$ 2.4 | 15.7 $\pm$ 2.2                  | 16.4 $\pm$ 2.1                   |
| MDA-MB231               | 16.2 $\pm$ 1,8                                   | 16.4 $\pm$ 1.8 | 16.4 $\pm$ 2.0 | 15.8 $\pm$ 2.5                  | 16.6 $\pm$ 1.9                   |
| A375P                   | 18.2 $\pm$ 1,6                                   | 18.0 $\pm$ 1.7 | 17.9 $\pm$ 1.3 | 18.7 $\pm$ 1.5                  | 17.7 $\pm$ 1.9                   |
| A375MC2                 | 18.2 $\pm$ 1.7                                   | 18.1 $\pm$ 1.5 | 17.9 $\pm$ 1.4 | 18.8 $\pm$ 1.8                  | 17.9 $\pm$ 2.0                   |

**Optical Stretching results for the PTX treated cells**

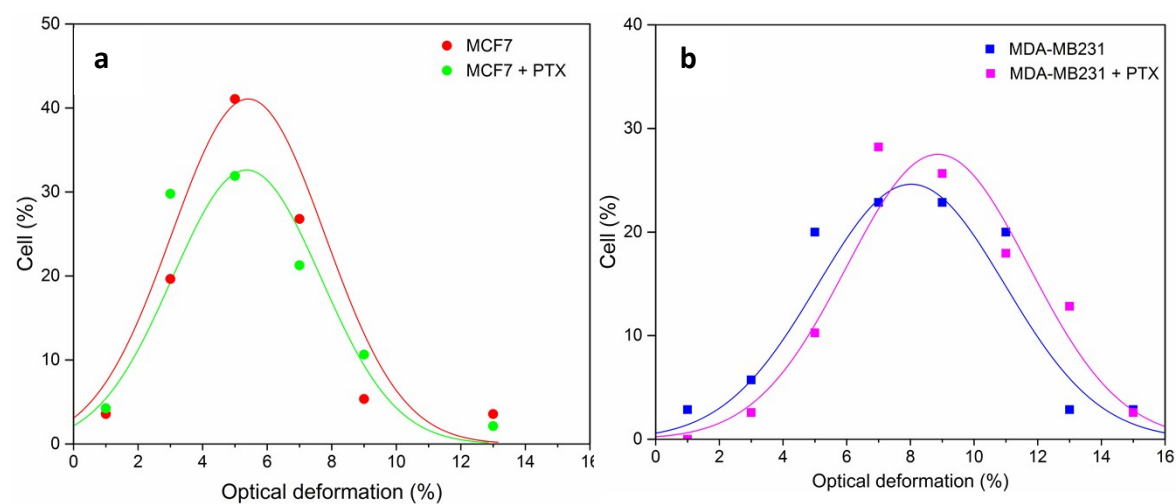

**Figure S2.** Optical deformation of (a) MCF7 and PTX treated MCF7 cells, and (b) MDA-MB231 and PTX treated MDA-MB231 cells.
